RETRACTION

# Retraction: Mesons from Laser-Induced Processes in Ultra-Dense Hydrogen H(0)

The *PLOS ONE* Editors

After publication, concerns were raised about the scientific validity of the results reported in this article [1]. The article was reassessed by a member of *PLOS ONE*'s Editorial Board and by two external reviewers with subject expertise who raised the following issues:

- The reported results are in conflict with the baryon number conservation law which forbids the production of the reported mesons. Claims of the presence of anti-baryons are not sufficiently supported by the evidence presented and are inconsistent with prior studies. The theoretical support published by other research groups cited in the article does not discuss the state of matter in question [2].
- The study's detection methods and the reported observations are insufficient to support the article's claims and are not sufficient to rule out other explanations. For example, a consulted reviewer advised that the reported meson decay time constants are consistent with "amplified electronics placed in the vicinity of intense laser irradiation experiments."

Based on the advice received, and in the absence of sufficiently strong evidence to support the claims made, the *PLOS ONE* Editors retract this article. We regret that these issues were not identified prior to the article's publication.

LH did not agree with retraction.

## References

1. Holmlid L (2017) Mesons from Laser-Induced Processes in Ultra-Dense Hydrogen H(0). *PLoS ONE* 12(1): e0169895. <https://doi.org/10.1371/journal.pone.0169895> PMID: 28081199
2. Hirsch JE. The origin of the Meissner effect in new and old superconductors. *Phys. Scr.* 2012; 85:035704.

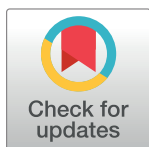

## OPEN ACCESS

**Citation:** The *PLOS ONE* Editors (2019) Retraction: Mesons from Laser-Induced Processes in Ultra-Dense Hydrogen H(0). *PLoS ONE* 14(2): e0212979. <https://doi.org/10.1371/journal.pone.0212979>

**Published:** February 22, 2019

**Copyright:** © 2019 The *PLOS ONE* Editors. This is an open access article distributed under the terms of the [Creative Commons Attribution License](https://creativecommons.org/licenses/by/4.0/), which permits unrestricted use, distribution, and reproduction in any medium, provided the original author and source are credited.
